# Supplementary material for: Model for End-stage Liver Disease excluding INR (MELD-XI) score in critically ill patients: Easily available and of prognostic relevance
Source: PLoS One. 2017 Feb 2;12(2):e0170987. doi: 10.1371/journal.pone.0170987 (PMC5289507; doi:10.1371/journal.pone.0170987)
Supplement: S1 Table — (XLSX) [file pone.0170987.s001.xlsx]

## Sheet: Tabelle1
	intraICUdeath	timeDtodeath	longtermdeath	dayofadmission	MELD-XI
32296	0	10	0
32298	0	697	0
32299	0	7	0	1
32300	0	1358	0
32301	0	9	0
32303	1	26	1	1
32304	0	7	0
32321	0	195	1
32322	0	29	0	1
32353	0	1240	0
32354	0	2451	1
32355	0	8	0
32384	0	5	0
32386	0	430	0
32389	0	269	0
32390	0	24	0	1
32409	0	2539	0
32455	0	62	0
32499	0	1	0	1
32503	0	417	0	1
32504	0	28	0	1
32506	0	27	0	1	4.58
32507	0	53	0	0	22.89
32508	0	66	0	1
32510	0	2181	0	1
32512	1	3	1	1
32514	0	2	0
32524	0	1469	0	1	16.8
32536	0	2543	0	1
32544	0	1589	0	1	4.09
32545	0	2456	0	1	5.4
32549	0	3	0	1	8.46
32553	0	12	0	1	8.89
32557	0	1	0	1	16.45
32576	0	2037	0	1
32584	0	131	0	1
32590	0	2530	0	1
32595	0	874	0	1	12.01
32600	0	9	0	1	9.32
32607	0	20	0	0	18.74
32609	0	8	0	1	19.8
32613	0	438	0	1	5.62
32618	0	387	0	1
32629	0	1	0	1
32630	0	2443	0	1
32639	0	2537	0	1
32650	0	5	0	1	4.51
32658	0	252	0	1
32660	0	1069	0	1
32666	0	126	0	1	12.94
32684	0	27	0	1
32691	0	1407	0	1	21.86
32692	0	7	0	1
32693	0	11	0	1	7.64
32694	0	2378	0
32698	0	2533	0	1	22.81
32711	0	1800	0	1
32712	0	5	0	1
32713	0	1280	0	1	10.95
32715	0	0	0	1
32717	0	420	1	1
32721	0	1	0	1	17.17
32730	0	261	0	1
32752	0	3	0
32756	0	5	0	1	8.3
32770	0	0		1	9.23
32772	0	188	0	1
32774	0	1	0	1	6.95
32775	0	2463	0	1	6.42
32777	0	6	0	1
32788	0	11	0	1	11.24
32798	0	1112	0	1	10.1
32803	0	2238	0	1
32809	0	551	1	1
32813	1	1	1	1
32819	0	20	0
32823	0	2	0	1	13.23
32824	0	1954	1	1
32825	0	2461	0	1	21.51
32828	0	4	0	1
32830	0	2530	0	1	9.32
32831	0	2342	0	1
32834	0	2235	0
32840	0	2361	0	1	17.85
32845	0	126	0	1	6.16
32848	0	1367	0	1
32850	0	1551	1	1	15.14
32851	0	1987	0	1	23.42
32852	0	56	0	1
32858	0	1003	1	1
32860	1	10	1	1
32861	0	1	0	1	31.59
32865	0	1462	1	1	13.7
32867	0	2365	0	1
32871	0	62	1	1	23.03
32878	0	2	0	1
32884	0	28	0	1	19.93
32897	0	1474	0	1
32903	0	14	0	1	22.42
32904	0	12	0	1	4.97
32908	0	2321	0	1
32917	1	4	1	1	39.55
32921	0	2446	0	1	7.01
32925	0	1	0	1
32927	1	25	1	0
32945	0	274	0	1	8.44
32955	0	2099	0	1
32957	0	637	0	0	16.47
32965	0	1056	0
32970	0	1056	0	1
32990	0	0		0	26.18
32998	0	2442	0	1
33008	0	1339	0	1
33013	0	9	0	1
33019	0	11	0	1
33021	0	767	0	1
33022	0	2520	0	1
33034	0	2366	0	1	5.82
33035	0	2520	0	1	7.82
33037	0	320	0	1	7.07
33045	0	2438	0	1	7.33
33049	0	2	0	1	12.65
33051	0	184	0	1
33052	0	597	0	1	8.98
33054	0	3	0	1
33097	0	4	0	1
33105	0	28	0	1	10.33
33106	0	2351	0	1	27.87
33112	1	2	1	1	15.46
33113	0	1287	0	1
33114	1	0	1	1
33115	0	213	1	1	17.26
33117	0	38	0	1	6.64
33119	0	2	0	1	7.96
33120	0	4	0	1
33132	0	2348	0	1	17.89
33135	0	3	0	1	1.43
33137	0	2454	0	1	6.8
33150	0	649	1	1	16.59
33158	0	1329	0	1
33164	0	1227	0	1	7.31
33165	0	0		1
33173	0	2374	0	1
33176	0	2490	0	1	27.18
33190	0	19	0	1	17.88
33204	0	2	0	1	15.88
33207	0	11	0	1	10.79
33219	0	1121	0	1	6.99
33220	0	4	0
33227	0	3	0	1
33254	0	2	0	1	32.24
33255	0	5	0	1	8.84
33274	1	0		1	19.7
33277	0	518	1	1
33283	0	5	0	1	15.96
33290	0	1521	1	1	29.75
33321	0	1329	0	1
33322	0	6	0	1
33324	0	2467	0	1
33327	0	1171	0	1
33335	0	662	0
33339	0	43	0	1
33356	0	38	0	1	15.1
33360	0	1218	1
33365	0	53	0	0	14.83
33377	0	539	0	1
33380	0	57	0
33384	0	2016	0	1
33405	0	151	0	1	-1.3
33406	0	10	0	1	8.29
33426	0	292	0	1	6.48
33430	0	203	0	1	6.46
33438	0	341	0	1	21.17
33450	0	4	0	1
33451	0	3	0	1
33455	0	881	0	1
33461	0	2355	0	1
33462	0	134	0	1
33495	0	9	0	1	13.12
33497	0	0		1	4.09
33520	0	5	0	1	7.39
33527	0	3	0	1	4.88
33530	0	27	0	1	28.49
33536	0	13	0	0	23.7
33541	0	567	0	1
33548	0	142	0	1
33551	0	116	1	1	15.92
33555	0	1114	0	1	7.79
33563	0	0		1	27.53
33587	0	2257	0	1
33601	0	3	0	1
33605	0	48	0	1	14.64
33608	0	595	0	1
33613	0	11	0	1	10.37
33615	0	190	0	1
33623	0	36	0	1
33637	0	982	0	1	7.57
33638	0	2381	0	1	9.74
33647	0	63	0	1	7.79
33662	0	4	0	1	4.48
33675	0	3	0	1	10.06
33679	0	1593	0	1	12.19
33680	0	0		0
33690	0	403	0	1	1.27
33692	0	571	1	1	8.77
33693	0	0		1	13.86
33735	0	2458	0	1
33736	1	1	1	1	29.43
33745	1	28	1	0	3.26
33754	0	58	1	1	13.54
33760	0	1	0	1	7.79
33761	0	946	0	1
33764	0	4	0	1	3.85
33765	0	2401	0	1	7.08
33769	0	2	0	1
33770	0	1809	0	0	25.66
33774	0	8	0	1
33780	0	2483	0	1	9.76
33781	0	1709	0	1
33784	0	6	0	0	29.28
33786	0	1006	0	1
33792	0	2481	0	1	8.17
33809	0	1425	0	1
33819	0	1122	0	1	5.33
33824	0	8	0	1	18.73
33826	0	3	0	1
33827	0	1427	0	1	11.07
33829	0	925	0	1
33830	0	105	0	1	10.5
33837	0	2041	0	1
33840	1	14	1	1	15.5
33848	0	1983	0	1
33850	0	0		1
33852	0	48	0	1
33868	0	356	0	1	11.74
33880	0	1895	0	1	6.21
33885	0	1412	0	1
33887	0	725	0	1
33889	0	55	0	1	5.41
33891	0	0	0
33897	0	46	0	1	15.07
33898	1	1	1	1
33905	0	30	0	1
33920	0	2265	1	1	18.32
33922	0	149	0	1	28.51
33929	0	8	0	1	-1.62
33935	0	2361	0
33938	0	8	0	1
33943	0	2352	0	1
33947	0	2145	0	1
33964	0	15	0	1
33973	0	231	0	1	14.87
33976	0	9	0	1
33984	0	193	0	1	5.01
34002	0	474	1	1	10.54
34007	0	667	0	0	13.45
34009	0	670	0	1
34014	0	93	0	1
34019	1	0	1	1	14.25
34022	0	1773	0	1	10.4
34046	0	2452	0	1
34054	0	9	0	1	8.3
34062	0	858	1	1
34063	0	7	0	1	2.62
34066	0	5	0	1	33.43
34069	0	849	1
34079	0	9	0	1
34106	0	1	0	1	10.48
34120	0	21	0	1	9.09
34121	1	10	1	1	14.49
34128	0	2186	0	1	18.82
34139	0	152	0	1
34140	0	107	0	1	8.65
34151	0	14	0	1
34156	0	9	0	1
34161	0	2	0	1	7.56
34170	0	1771	1
34177	0	1944	0	1	8.87
34181	0	2141	0	1	34.06
34182	0	56	0	1	15.12
34200	0	1860	0	1	10.67
34205	0	12	0	1	9.9
34215	0	4	0	1	15.03
34218	0	5	0	1
34219	1	1	1	1	22.22
34221	0	56	0	1	12.7
34224	0	64	1	1	7.82
34234	0	28	0	1
34238	0	1397	0	1
34244	0	1259	1	1	6.74
34246	0	1739	0	1	11.93
34252	1	0	1	1
34282	0	2	0	1
34325	0	43	0	1
34330	0	2288	0	1
34333	0	1216	1	1
34337	0	2149	0	1
34338	1	0	1	1
34343	0	599	0	1
34346	0	1458	1	1	25.39
34349	0	1	0	1
34357	0	2454	0	1
34365	1	0	1
34368	0	49	0	1	11.07
34373	0	5	0	1	26.54
34382	0	6	0	1
34386	0	20	0	1	16.44
34392	0	9	0	1	6.92
34398	0	9	0	1	4.36
34399	0	26	0	1	6.71
34402	0	1187	0	1
34404	0	1782	0	1
34405	0	4	0	1
34414	0	535	0	1	25.37
34419	0	419	1	1	17.75
34444	0	1436	0	1
34472	0	483	0	1
34476	0	4	0	1	4.65
34482	0	3	0	1	12.6
34488	0	40	0	1	8.21
34494	0	2	0	1	12.08
34497	0	52	0	1	8.59
34498	0	2193	1	1	34.59
34505	0	17	0	1
34508	1	3	1	1	8.17
34536	0	623	0	1
34538	0	2	0	1
34540	0	13	0	1	33.06
34565	0	2305	0	1
34578	0	1855	0	1
34580	0	282	0	1
34581	0	366	0	1
34582	0	1380	0	1
34584	0	1695	1	1	-0.28
34587	0	2268	0	1
34593	0	1884	0	1	4.09
34602	0	2188	1	1
34603	0	0		1
34604	0	2239	0	1
34607	0	87	1	1	12.18
34630	0	0		1	27.82
34632	0	1667	1	1	7.86
34639	0	2438	0	1
34641	0	31	0
34642	0	1669	1	1	37.24
34653	0	83	1	1
34663	0	9	0	1	13.45
34676	0	1152	0	1	10.96
34682	0	27	0	0	11.07
34720	0	5	0	1	9.25
34725	0	187	1	0	22.75
34729	0	33	0	1	30.14
34730	1	24	1	0	22.82
34745	0	880	0	1	12.37
34746	0	10	0	1
34751	0	1522	1	1
34753	0	2424	0	1
34761	0	31	0	1
34773	0	28	0	1	11.95
34785	0	2238	0	1
34798	0	3	0	1	4.56
34804	0	14	0	1	11.72
34805	0	2	0	1	7.64
34830	0	936	0	1	12.51
34847	0	29	0	1	26.82
34854	1	0	1
34870	0	4	0	1	16.83
34871	0	0		1
34872	0	295	0	1	30.98
34876	0	3	0	1	4.74
34878	1	11	1	1	22.01
34882	0	9	0	1	4.46
34888	1	33	1	0	19.51
34898	0	1	0	1	6.13
34899	1	13	1	1	20.87
34913	0	314	0	0	10.7
34964	0	1460	0	1	5.55
34974	0	10	0	1
34980	1	0	1	0	27.38
34983	0	1	0	1	3.97
34995	0	113	0	1
35015	0	6	0	1
35019	0	2026	0	1
35031	0	1826	0	1	34.19
35038	1	1	1	1
35044	0	65	0	0
35053	0	94	1	1
35062	0	2430	0	1	9.89
35066	0	8	0	1	6.44
35084	0	73	0	1	17.1
35097	0	2005	0	1	12.06
35101	0	1766	0	1	7.66
35103	0	1711	0	1	4.91
35109	0	2426	0	1
35110	0	848	0	1	6.46
35123	0	245	0	1	9.75
35135	0	4	1	1
35165	0	39	0	1	31.03
35180	0	203	0	1	6.32
35194	0	151	0	1	17.66
35218	0	0		1	22.66
35225	0	1	0	1
35242	0	4	0	1
35268	1	7	1	0	26.2
35272	0	1912	1	1
35275	1	1	1	1	19.81
35283	0	20	0	1	20.73
35294	0	2224	0	1	12.81
35309	0	102	1	1	20.8
35313	0	17	0	1	21.56
35321	1	1	1	1	10.31
35322	0	2599	0	1
35334	0	263	0	1
35341	0	2971	0	1	6
35344	1	1	1	1	12.1
35350	0	1	0	1	7.35
35378	0	9	0	1	8.25
35380	0	1000	0	1	25.94
35390	0	18	0	1	2.8
35393	1	23	1	1	-0.76
35396	0	7	0	1	6.16
35400	0	1	0	1
35412	0	3030	0	1
35414	0	140	0	1
35418	0	5	0	1	14.7
35424	0	4	0	1	3.17
35428	0	2312	0	1
35433	1	3	1	1	20.49
35435	1	4	1	1	20.03
35438	0	30	0	1
35452	1	1	1	1	13.71
35462	0	2929	0	1
35467	0	2036	0	1
35475	0	3	0	1	6.65
35479	0	681	0	1	3.27
35480	0	785	0	1	4.85
35489	0	4	1	1
35498	0	2	0	1	32.61
35517	0	76	0	1
35518	0	1712	0	1	9.32
35540	0	766	0	1
35549	0	1798	0	1
35562	0	1763	0	1	13.05
35567	0	1634	1	1
35572	0	5	1	1	9.86
35577	0	1639	0	1	12.41
35586	0	855	0	1
35589	0	0	0	1
35609	0	3019	0	1
35615	0	6	0	1	5.43
35619	0	2840	0	1	9.38
35621	0	1637	0	1	13.73
35633	0	1180	0	1	3.8
35640	0	15	0	1	16.77
35645	0	3	0	1
35646	0	229	0	1	17.39
35648	0	906	0	1	1.63
35652	0	2101	0	1	7.05
35654	0	918	1	1	4.88
35656	0	2842	0	1	9.13
35660	0	383	0	1	13.91
35661	0	760	0	1
35663	0	3239	0	1	8
35667	0	82	1	1	31.1
35670	1	38	1	0	13.36
35671	1	1	1	1	17.96
35673	0	3	0	1	18.2
35678	0	0	0
35682	0	2153	0
35683	0	756	0	1
35692	0	3129	0	1	-1.94
35700	0	1	0	1	5.53
35711	0	557	1	1	25.68
35712	0	35	0	1	12.03
35716	0	756	0	1	12.17
35718	0	257	0	1	16.97
35766	0	7	0	1	28.93
35770	0	4	0	1	29.61
35781	1	3	1	1	35.07
35784	0	2830	0	1	3.6
35786	0	2305	0	1	4.74
35803	0	2339	0	1
35804	0	49	0	1	25.63
35809	0	3087	0	1
35810	0	3208	0	1	4.72
35825	0	3	0	1	11.14
35826	0	1736	0	1	18.63
35838	0	1367	0	1	30.24
35841	0	640	0	1	3.85
35843	0	1366	0	1	7.93
35844	1	0	1
35857	0	1	1	1
35865	0	1	0	1
35867	0	39	0	1	26.16
35882	0	7	0	1	17.5
35885	0	7	0	1	8.74
35890	0	23	0	1	26.81
35891	0	2761	0	1
35895	0	2333	0	1	9.4
35897	0	9	1	1	5.27
35907	0	1118	1
35911	0	45	0	1
35912	0	2054	0	1	7.31
35917	0	1098	0	1
35926	0	2676	1	1	3.68
35932	0	2	0	1
35938	0	1287	0	1	10.84
35952	0	2507	0	1	20.97
35969	0	4	0	1	3.78
35971	0	32	0	1	16.24
35976	0	61	0	1
35980	0	126	0	1	9.39
35981	0	2968	0	1	9.16
35982	0	3	0	1	5.15
35986	0	3122	0	1
35990	0	3258	0	1
35993	0	3285	0	1
35996	0	2	0	1
36001	1	1	1	1	17.38
36004	0	29	0	1	11.44
36007	0	0	0	1
36009	0	35	0	1	26.94
36027	0	3199	0	1	31.63
36031	0	92	0	1	9.68
36034	1	0	1	1
36041	0	3194	0	1
36052	0	13	0	1	12.51
36055	0	3147	0	1	7.05
36064	0	1	0	1
36069	0	3162	0	1
36072	0	6	0	1	17.79
36074	0	614	0	1	2.01
36076	0	37	0	1
36078	0	26	0	1
36090	0	1572	1	1	8.73
36095	0	865	0	1	25.28
36101	0	3087	0	1
36105	0	3260	0	1	5.85
36111	0	2520	0	1
36116	0	0	0	1
36118	0	2	0	1	4.09
36126	1	13	0	1	22.51
36128	0	1578	0	1	35.8
36135	0	395	0	1	5.79
36137	0	151	0	1	31.86
36150	0	1	0	1	8.9
36156	0	1673	0	1
36163	0	4	1	1
36165	0	197	0	1	5.27
36168	0	814	1	1	10.78
36180	1	5	1	1	27.09
36185	0	2316	0	1	4.35
36194	0	12	0	1	28.1
36204	0	15	0	1	34.82
36208	0	22	0	1	1.81
36211	0	342	0	1	6.58
36239	1	0	1	1
36240	0	1	0	1	8.07
36249	0	1170	0	1	11.61
36252	0	93	0	1	15.18
36253	0	3196	0	1	6.38
36255	0	12	0	1	28.72
36256	0	25	1	1	16.1
36271	1	2	1	1	14.93
36272	0	23	1	1	7.77
36279	0	1	0	1	12.6
36288	0	26	0	1
36289	0	146	1	1	9.45
36304	0	1	0	1	12.89
36420	0	2384	0	1	5.28
36424	0	7	0	1	12.2
36434	0	3239	0	1	2.32
36439	1	0	1	1
36443	0	2843	0	1	9.47
36444	0	362	0	1
36450	0	30	0	1	21.21
36453	0	2376	0	1	12.68
36456	0	53	1	1	7.18
36478	0	2470	0	1	31.44
36482	0	43	0	1
36491	0	9	0	1	11.82
36510	0	2	1	1	15.91
36515	0	3234	0	1
36517	0	785	0	1	16.9
36521	0	8	0	1	16.15
36532	0	53	0	1	24.77
36534	0	2870	0	1	1.81
36542	0	1	0	1	19.81
36546	0	2210	0	1	0.67
36547	0	1	0	1	5.23
36548	1	1	1	1	3.93
36553	0	3126	0	1	7.5
36557	0	195	1	1
36563	0	13	1	1	40.09
36569	0	0	0
36571	1	10	1	0	8.77
36573	0	451	0
36600	0	2914	0	1
36606	0	12	0	1
36621	0	9	0	1
36629	1	5	1	1	23.78
36643	0	2468	0	1	4.56
36647	1	4	1	1	8.43
36653	0	2328	0	1	-0.52
36658	0	2925	0	1
36660	0	1233	1	1	11.26
36665	0	776	0	1
36686	0	2835	0	1	4.66
36697	0	23	1	1	35.2
36700	1	4	1	0	19.56
36711	0	2703	0	1
36722	0	1626	0	1	2.57
36731	0	2941	0	1
36735	1	5	1	1	9.68
36757	0	2857	0	1
36763	0	408	0	1	5.78
36765	0	920	0	1
36787	0	3116	0	1
36789	0	1028	0	1
36797	0	204	1	1	12.14
36802	0	17	0	0	36.15
36819	0	94	0	1
36838	0	7	0	1	26.92
36862	0	116	0	1	10.5
36894	1	0	1	1
36900	0	6	1	1
36908	0	1368	0	1
36928	0	2443	0	1	30.21
36934	0	2229	1	1	13.19
36935	0	1393	0	1	6.87
36937	0	250	0	1	8.3
36940	1	10	1	1	24.42
36952	0	955	0	1	34.82
36967	0	2	0	1	25.37
36983	0	4	0	1	7.82
36984	1	0	1
36993	0	3105	0	1	12.31
36998	0	3049	0	1	12.87
37019	0	3127	0	1	9.93
37026	1	1	1	1
37028	0	338	0	1	2.13
37030	0	92	0	1	30.44
37036	0	49	0	1	24.11
37044	0	1	0	1	8.12
37047	0	2675	0	1	-9.39
37053	0	3017	0	1	12.52
37063	0	2866	1	1
37069	0	21	0	1
37073	0	48	1
37076	0	6	0	1	4.25
37079	0	3128	0	1	6.48
37097	0	1861	1	1	44.28
37110	1	27	1	1	16.93
37112	0	950	0	1	37.53
37120	0	20	1	1	16.35
37125	0	96	1	1	13.74
37132	0	1097	1	1	12.33
37144	0	99	0	1	13.81
37148	0	102	1	1	8.97
37151	0	874	0	1
37165	0	1	0	1
37167	0	927	1	1
37176	0	28	0	1	28
37183	0	2	0	1	5.71
37191	1	15	1	1	25.5
37204	0	2275	0	1	4.97
37206	1	1101	1	1	12.94
37207	0	1	0	1
37223	0	3018	1	0	13.05
37236	1	0	1	1
37251	0	166	1	1	25.08
37254	0	12	0	1	13.42
37259	0	109	0	1	8.44
37260	1	0	1	1
37263	0	224	0	1	20.5
37289	0	3037	0	1	6.15
37317	0	15	0	0	9.76
37319	0	9	0	1	20.43
37324	0	5	0	1	25.77
37339	0	38	0	1	14.21
37347	0	3033	0	1	5.39
37356	1	1095	1
37364	0	486	0	1
37366	0	21	0	1	15.02
37374	0	4	0	1
37379	0	2906	0	1	0.29
37386	0	13	0	1
37396	0	497	0	1	13.57
37397	0	2	0	1
37419	0	284	1	1	11.1
37429	0	901	0	1	7.53
37430	0	941	0	1
37445	0	3147	0	1	22.82
37451	1	2	1	1
37457	1	1	1	1	14.78
37460	0	5	0	1	18.7
37466	0	2752	0	1	8.07
37484	0	30	0	1
37490	0	2406	0	1
37502	0	1	0	1	19.38
37503	1	19	1	1	5.95
37504	0	1981	1	1
37505	0	862	0	1	18.61
37507	0	3028	0	1
37512	0	559	0	1
37517	0	1	0	1	13.14
37521	0	2047	0	1	8.3
37526	0	2	0	1	8.48
37530	0	7	0	1	5.53
37536	0	1	0	1	19.44
37539	0	17	0	1	21.6
37541	1	15	1	0	0.04
37544	1	142	1	0	16.69
37547	1	1	1	1	13.15
37554	1	45	1	0	28.78
37561	0	2835	0	1	5.39
37566	0	73	1	1
37572	0	7	0	1	4.18
37578	0	1599	0	1	6.34
37579	0	641	0	1
37603	0	244	0	1	18.39
37632	0	39	0	0	15.59
37641	0	3125	0	1
37663	0	2545	0	1	9.33
37666	0	1	0	1
37686	1	12	1	1	20.79
37704	0	1860	0	1	6.65
37706	0	5	0	1
37715	0	1	0	1
37738	0	4	0	1
37740	1	47	1	1
37744	0	2736	0	1
37753	0	1	0	1	7.5
37757	0	2566	0	1	14.63
37768	0	33	1	1	11.13
37773	0	2762	0	1	2.65
37804	1	0	1	1
37806	0	7	0	1
37815	0	756	0	1	5.71
37835	0	5	0	1	5.08
37836	0	4	0	1
37853	0	73	1	1	16.23
37857	0	34	0	1
37858	0	0		1	13.77
37868	0	3005	0	1	10.72
37874	0	2391	0	1	6.29
37881	0	2742	0	1	7.1
37892	0	244	0	1	19.64
37896	0	658	0	1	8.44
37898	0	681	0	1	6.33
37899	0	8	0	1	7.05
37905	0	2	0	1	7.5
37913	0	36	0	1	0.29
37936	0	2	0	1	6.75
37942	0	0	0	1
37957	0	4	1	1	27.29
37964	0	3000	0	1	10.33
37969	0	9	0	1
37972	1	5	1	1	22.5
37977	1	2	1	1	19.78
37991	1	9	1	1	12.49
37992	0	422	0	1	19.1
38005	0	228	0	1	7.94
38017	0	2290	1	1
38025	0	2133	0	1	7.44
38030	0	361	0	1
38041	0	3024	0	1
38055	0	18	0	1
38061	0	201	0	1	3.24
38072	0	0	0	1
38073	0	68	0	1	5.8
38074	0	5	0	1	4.53
38078	0	2867	0	1	9.99
38089	0	2684	0	1
38098	0	800	0
38099	0	3	0	1	8.65
38100	0	32	0	1	3.93
38115	0	3037	0	1	3.67
38118	0	2533	0	1
38126	1	0	1
38131	0	1182	0	1	5.18
38137	1	1	1	1	41.61
38148	0	3	0	1
38164	0	10	0	1	3.78
38168	0	3	0	1	15.65
38169	1	18	1	1	18.55
38180	0	1151	0	1	5.97
38181	0	5	0	1
38182	0	2903	0	1	3.8
38188	1	3	1	1	15.66
38189	0	519	1	1	5.72
38190	0	3084	0	1	30.48
38208	1	0	1
38215	0	1	0	1
38217	0	1638	0	1	9.59
38219	0	10	0	1	16.05
38230	0	17	0	1	16.83
38253	0	2674	0	1	4.35
38266	0	0		1	10.33
38287	0	14	0	1	8.98
38290	0	32	1	1	8.99
38295	0	5	0	1
38298	0	2580	0	1	42.38
38300	0	44	1	0	-2.02
38305	0	2	0	1	4.08
38310	0	566	0	1	1.01
38322	0	1331	0	1	9.22
38357	0	2423	0	1	22.46
38365	0	1892	1	1
38367	0	49	1	1
38370	0	2486	0	1	11.05
38392	0	2983	0	1	5.37
38401	0	2952	0	1	4.01
38405	0	62	0	0	26.13
38416	1	2	1	1	7.83
38418	0	299	0	1	9.79
38425	0	14	1	1	13.86
38457	1	3	1	1	17.4
38462	1	1	1	1
38482	0	1301	0	1	8.87
38490	0	29	0	1
38496	0	2441	0	1	6.7
38501	1	19	1	1	17.45
38506	0	2042	0	1
38507	0	1821	0	1
38515	0	3	0	1	3.17
38516	1	0	1	1
38520	0	42	0	1	9.94
38522	0	111	0	1
38527	0	25	1	1
38531	0	3	0	1
38533	0	1829	0	1	4.79
38540	1	23	1	1	20.44
38562	0	2926	0	1	8.07
38567	0	1	0	1	3.7
38569	1	0	1	1
38572	0	2921	0	1	11.91
38573	0	6	0	1	14.26
38596	0	1	0	1	14.1
38611	0	1	0	1	16.77
38612	0	1988	0	1	0.79
38635	0	4	0	1	5.5
38649	0	305	0	1	1.8
38651	1	7	1	1	20.01
38659	0	14	0	1	4.79
38661	0	2284	0	1
38667	0	9	0	1
38670	0	1540	1	1	11.75
38674	0	1415	0	1	14.35
38677	0	3098	0	1	12.66
38694	0	101	0	1	17.41
38708	0	23	0	1	17.89
38716	0	26	1	1	45.18
38720	0	1	0	1
38722	0	1012	0
38726	0	1156	0	1	23.83
38743	0	1884	0	1	8.6
38754	1	3	1	1	5.95
38767	1	18	1	0	1.12
38771	1	6	1	1	16.6
38772	0	1878	0	1	11.42
38795	0	2886	0	1	7.03
38800	0	2907	0	1
38806	1	18	1	1	29
38814	0	2794	0	1	35.33
38816	0	939	0	1	28.37
38851	0	1760	1	1	25.23
38854	0	728	0	1	8.55
38867	0	5	0	1
38872	1	0	1
38874	0	5	0	1	12.01
38877	1	0	1
38885	0	1	1	1	32.75
38894	0	2982	0	1	7.94
38895	0	858	0	1	5.58
38913	0	54	0	1	12.42
38918	0	3081	0	1
38919	0	95	0	1
38922	1	5	1	1	36.93
38938	0	449	1	1	28.49
38950	0	0		1	11.09
38952	0	1059	0	1	11.6
38960	0	171	0	1
38965	0	78	0	1	15.68
38980	0	462	0	1
38999	0	163	0	1	1.75
39010	1	0	1	1
39025	1	9	1	0	18.33
39032	0	177	0	1
39034	0	13	0	1	14.48
39040	0	1885	0	1	9.17
39060	0	56	1	1
39061	0	2042	0	1	6.67
39072	0	5	0	1	30.91
39073	0	1408	0	1	4.58
39079	0	2677	0	1	6.37
39084	1	2	1	1	21.64
39088	0	281	0	1
39094	1	1	1	1	23.39
39096	1	8	1	1	17.77
39113	0	21	0
39126	0	44	0	1	23.94
39157	0	246	0	1	3.29
39163	1	21	1	0	11.05
39173	0	5	0	1	27.54
39179	1	8	1	1	20.18
39183	0	2538	0	1
39187	0	1238	0	1	24.3
39219	1	1	1	1
39226	0	1	0	1
39234	0	3	0	1
39239	0	1074	0	1
39240	0	2948	0	1
39250	0	7	0	1	2.99
39270	0	2594	0	1	8.89
39274	0	7	0	1	2.96
39289	0	57	1	1	19.11
39290	0	1	0	1	7.22
39297	0	2432	0	1	6.93
39315	0	3	0	1	29.15
39319	0	682	0	1	11.55
39329	1	4	1	1	19.03
39330	0	8	0	0
39332	0	3	0	1	0.73
39336	0	2072	0	1	6.29
39338	0	290	1	1
39340	0	1228	0	0	27.82
39345	0	874	1	1
39350	0	7	0	1	13.71
39356	0	1	1	1
39362	0	4	0	1	5.18
39369	0	904	0	1
39375	0	2304	0	1
39380	0	1	0	1	7.86
39410	0	2422	0	1	8.42
39425	0	1104	0	1
39437	0	2763	0	1	7.68
39455	0	1644	0	1
39459	0	3	0	1
39460	0	578	0	1	10.1
39473	0	37	0	1
39477	0	907	0	1	8.68
39492	1	11	1	1	18.47
39512	0	1045	0	1	-7.36
39531	1	12	1	1
39538	0	2	0	1	1.37
39550	0	2951	0	1	0.17
39551	0	43	1	1	15.29
39552	0	1042	0	1	-9.93
39553	0	34	0	0	10.64
39570	0	3	0	1	3.47
39573	0	1641	0	1	8.68
39602	0	1726	1	1	5.55
39609	0	38	1	1
39616	0	3	0	1	15.34
39627	0	0	0	1	3.89
39643	0	6	0	1	9.22
39645	0	1358	0	1	17.16
39652	0	2842	0	1	39.14
39660	0	7	0	1
39662	0	9	0	1
39669	1	9	1	0	25.33
39675	0	491	0	1	8.2
39677	0	262	0	1	16.6
39680	0	3017	0	1
39691	0	1146	0	1	4.72
39700	1	13	1	0	23.63
39702	0	25	0	1	4.72
39704	0	2806	0	1	12.03
39705	0	1989	0	1
39716	0	68	1	1	30.59
39731	0	10	0	1	24.58
39737	0	67	1	1	25.88
39740	0	5	0	1	6.18
39755	1	19	1	0	5.04
39759	0	281	0	1	2.61
39764	0	6	0	1	7.06
39781	0	2455	0	1	7.47
39804	0	19	0	1	8.25
39810	1	8	1	1	21.69
39814	0	249	0	1	10.81
39820	0	2195	0	1	8.25
39826	0	2432	0	1	14.02
39848	0	17	0	1	11.46
39851	0	193	0	1
39852	0	2230	0	1	7
39854	0	113	0	1	22.4
39855	0	1370	0	1	13.68
39878	0	2274	0	1	6.93
39882	0	5	0	1	5.38
39914	1	1	1	1	17.15
39921	0	236	0	1	8.3
39922	0	19	1	1	22.39
39925	0	1888	0	1
39930	0	985	0	1	9.22
39952	1	0	1	1
39953	0	1468	0	1	23.43
39957	0	9	1	1	11.83
39958	0	3	0	1	12.25
39961	0	2584	0	1	5.91
39963	0	253	0	1	4.81
39979	0	16	0	1	10.01
39987	0	2227	0	1
39989	0	4	0	1	9.45
39994	0	1970	0	1	36.88
39995	0	2919	0	1
39998	0	11	1	1	23.11
40014	1	60	1	1	29.73
40025	0	2129	0	1	3.79
40026	0	619	0	1	13.98
40050	1	2	1	1	16.96
40053	0	442	0	1	3.89
40071	0	1881	0	1	5.28
40072	0	2850	0	1	5.72
40092	0	3	0	1	6.78
40093	0	6	0	1	21.2
40094	0	2	0	1	12.79
40098	0	14	1	1	30.84
40103	0	8	1	1	7.28
40107	0	1113	0	1
40114	0	5	0	1	4.39
40120	1	2	1	1	15.03
40124	0	1739	0	1	2.82
40134	0	11	1	1
40139	0	2912	0	1
40148	0	2866	0	1
40154	0	1963	0	1	31.3
40155	0	1694	1	1	12.51
40181	0	9	0	1	5.35
40185	0	1953	0	1	6.46
40199	0	22	0	1	8.58
40202	0	2932	0	1	10.85
40208	0	91	0	1	0.53
40214	0	1	0	1	8.3
40230	0	1383	0	1	8.48
40232	0	2161	0	1	15.2
40238	0	186	1	1
40243	0	2027	1	1	5.94
40247	0	5	0	1	22.39
40253	0	2	0	1	19.69
40256	0	2075	0	1
40263	1	1	1	1	29.91
40264	0	2934	0	1	9.39
40272	0	18	0	1	18.22
40301	0	2626	0	1	22.47
40303	0	515	0	1	15.68
40316	0	2851	0	1	13.79
40318	0	66	0	1	32.01
40319	0	1	0	1	10.2
40321	0	1977	0	1	11.63
40329	0	67	0	1	31.12
40344	0	2996	0	1	8.99
40347	1	10	1	1
40348	0	35	0	1	12.83
40351	0	51	0	1
40353	0	2044	0	1
40366	1	1	1	1	21.53
40367	0	92	1	1	10.09
40393	1	11	0	1	8.89
40407	0	1971	0	1	10.12
40417	0	1999	0	1	-1.94
40429	0	228	0	1	14.2
40430	0	2	0	1	5.97
40452	0	2631	0	1	6.67
40458	0	2430	0	1	12.5
40471	0	229	0	1	3.53
40480	0	1583	0	1	7.39
40483	0	221	0
40484	0	71	0	1
40493	0	5	0	1	12.22
40501	0	291	1	1	24.94
40515	0	2030	0	1	5.54
40521	0	630	0	1	4.11
40528	0	0		1	8.14
40570	0	2212	0	1
40601	0	28	1	1	7.27
40604	0	291	1	1	7.19
40624	1	2	1	1	18.75
40625	0	958	0	1	10.36
40627	0	13	0	1	13.5
40647	0	32	0	1	27.33
40676	0	133	1	1	22.44
40687	0	1358	0	1	8.81
40691	0	2216	0	1	9.37
40739	0	1280	0	1	10.42
40756	0	490	0	1	7.31
40757	0	2879	0	1	10.64
40759	0	14	0	1	9.22
40763	0	27	0	1	17.74
40765	0	1356	0	1
40775	0	1	0	1	3.71
40777	0	2954	0	1	6.48
40785	0	516	0	1	2.61
40803	0	14	1	1	17.21
40805	0	2497	1	1	9.62
40807	0	2	0	1	9.54
40814	1	8	1	1	13.63
40819	0	29	1	1	14.07
40830	0	2012	1	1	11.93
40838	0	27	0	1	30.22
40844	0	2377	0	1
40848	0	400	0	1	5.31
40854	0	2937	0	1	7.88
40884	0	556	0	1	11.59
40888	0	799	0	1	4.28
40898	0	8	0	1	2.12
40912	0	2836	0	1
40916	0	651	0	1
40920	0	1728	1	1	19.14
40939	0	153	0	1	25.08
40945	0	2354	1	1	10.48
40959	0	0		1	3.48
40961	0	1	0	1	6.33
40967	0	1263	1	1	4.88
40969	0	625	1	1	10
40978	1	1	1	1	20.64
40987	0	9	0	1	24.3
40989	0	2	0	1	5
40991	0	817	0	1	8.39
40996	0	34	0	1	8.65
40998	0	1325	0	1	5.59
41019	0	3	0	1	4.71
41037	0	1250	0	1	20.23
41039	1	1	1	1
41045	0	1343	1	1	5.42
41061	0	98	1	1	8.93
41063	0	1	0	1
41065	0	2876	0	1	3.47
41073	0	2703	0	1	10.99
41086	0	2850	0	1	8.21
41092	0	2897	0	1	6
41099	0	2890	0	1	6.44
41101	0	100	1	1	15.49
41104	0	2915	0	1	2.54
41109	0	146	0	1	6.27
41114	0	10	0	1
41121	0	4	0	1	7.87
41126	0	1467	0	1	14.45
41128	0	62	0	1	3.96
41137	0	4	0	1	6.26
41174	1	1	1	1
41178	0	378	0	1	19.45
41182	0	2876	0	1	12.27
41183	0	2	0	1	6.04
41198	0	91	1	1	12.47
41242	0	1683	0	1	-2.46
41246	0	6	0	1
41247	0	75	0	1	10.5
41248	0	1852	0	1	1.32
41252	0	438	0	1	4.27
41255	1	8	1	1	16.46
41260	0	2153	0	1	5.33
41267	0	796	0	1	17.8
41270	1	0	1	1
41273	1	0	1
41313	0	2351	0	1	9.68
41321	0	2619	0	1	7.23
41328	0	1699	0	1
41342	0	574	0	1	29.67
41343	0	7	0	0	17.17
41344	0	6	0	1	13.4
41354	0	2203	0	0	1.62
41365	0	2779	0	1	8.44
41366	0	70	0	1	14.53
41368	0	1758	0	1	1.53
41387	0	2401	0	1	7.02
41414	0	739	0	1	4.37
41417	0	4	0	1	5.24
41426	0	7	0	1
41450	0	1408	0	1	8.31
41459	0	7	0	1	1.99
41460	0	469	0	1	11.24
41478	1	2	1	1	19.04
41481	0	726	0	1	10.17
41485	0	2	0	1	11.32
41490	0	2327	1	1
41509	0	25	0	1
41510	0	2128	0	1
41521	0	2895	0	1
41526	0	3	0	1	4.24
41542	1	1	1	1
41546	1	38	1	0	24.3
41547	0	3	0	1	1.57
41552	0	386	0	1	39.73
41555	0	577	0	1	17.07
41563	0	234	0	1	17.67
41569	0	1408	0	1	10.53
41571	0	4	0	1	5.43
41574	0	1163	0	1	7.23
41588	0	1983	0	1	6.54
41591	0	443	0	1	5.3
41600	0	2596	0	1	7.56
41622	1	8	1	1	5.53
41631	0	25	0	1	21.7
41637	0	55	0	1
41640	0	2866	0	1	9.74
41641	0	2462	0	1	4.79
41643	1	5	1	1	10.57
41646	0	0		1
41658	1	3	1	1	1.9
41675	0	2850	0	1	5.33
41681	0	106	0	1	4.25
41684	0	1343	0	1	5.61
41703	0	1211	0	1	-0.56
41712	0	2379	1	1	2.54
41713	0	366	0	1	5.97
41726	0	29	0	1
41732	0	13	0	1	8.75
41735	0	1251	0	0	-3.89
41740	0	211	0	1	12.04
41743	0	2756	0	1	11.88
41753	0	13	0	1	7.41
41754	0	513	0	1	7.93
41758	0	6	1	1
41761	0	2792	0	1	6.4
41762	0	2840	0	1	13.58
41772	0	772	0	1	15.13
41793	0	0	0	1
41795	0	2661	0	1	10.77
41798	0	1396	0	1
41803	0	175	1	1	15.91
41806	0	53	0	1	23.39
41826	0	2125	0	1	6.18
41845	0	42	0	1	17.68
41854	0	71	0	1	6.65
41861	0	344	1	1	5.85
41868	0	2	0	1	11.31
41870	0	1208	0	1
41883	0	172	1	1	25.03
41892	0	27	0	0	19.29
41907	0	6	0	1	21.99
41912	0	1119	0	1	5.34
41918	0	18	0	1
41920	0	10	0	0	12.92
41929	1	1	1	1	32.24
41931	0	1986	0	1
41941	0	24	0	1	15.23
41955	0	2892	0	1	7.63
41966	0	2867	0	1	10.93
41968	0	336	0	1
41971	0	2363	0	1	7.57
41972	0	1	0	1	2.54
41976	0	17	0	1	9.79
41987	1	0	1	1
41990	0	30	1	1	5.74
42006	1	0	1
42010	0	2836	0	1	1.17
42013	0	0		1	7.56
42016	0	2	0	1	8.4
42025	0	2547	0	1	8.06
42031	0	544	0	1	20.39
42035	1	11	1	1	27.33
42036	0	84	0	1	2.97
42048	0	2700	0	1	8.84
42061	0	2565	0	1	1.45
42067	0	4	0	1	7.63
42069	0	3	0	1
42076	0	1011	0	1	16.43
42088	1	0	1	1
42109	0	7	0	1	7.64
42113	0	2	0	1	-1.72
42119	0	160	1	0	25.91
42122	0	1204	1	1	5.71
42132	0	15	0	1
42150	0	2721	0	1	7.26
42151	1	22	1	0	23.78
42160	0	1	1	1
42179	0	697	0	1	7.76
42193	0	279	0	1	8.39
42195	0	2831	0	1
42198	0	0		1	10.82
42200	1	0	1	1
42205	0	126	0	1	15.81
42207	0	1645	0	1
42239	0	2416	0	1
42245	0	2053	0	1	13.38
42256	0	37	0	1	3.15
42259	0	1538	0	1	12.15
42272	0	1251	0	1	7.57
42309	0	145	0	1	17.25
42319	0	1903	0	1	2.21
42330	1	4	1	1	15.12
42331	0	2868	0	1	14.37
42334	0	128	0	1	4.39
42338	0	0		1
42353	0	518	0	1
42358	0	0		1	10.98
42359	0	1992	0	1	10.1
42361	0	8	0	1	13.53
42365	0	4	1	1	15.43
42375	0	2774	0	1	9.64
42395	0	9	0	1
42406	0	0		1	4.57
42413	0	2401	0	1	6.49
42414	0	13	0	1	5.72
42421	0	21	0	1	33.04
42423	1	1	1	1	13.92
42439	0	2784	0	1	8.25
42444	0	139	0	1	9.26
42454	0	371	0	1	8.4
42461	0	1068	0	1	2.82
42468	0	11	0	1	21.27
42469	1	2	1	1	23.67
42474	0	0		1	27.86
42476	0	1759	0	1	3.24
42480	0	2460	0	1	19.38
42481	0	3	0	1	8.29
42483	0	52	0	1	29.86
42488	0	3	0	1	1.75
42505	0	38	0	1	7.29
42506	0	2558	0	1	9.49
42514	1	2	1	1	12.35
42523	0	43	0	1	6.58
42540	0	0		1
42541	0	1881	0	1	10.85
42544	0	1	0	1	22.68
42550	0	2678	0	1	7.37
42553	0	48	0	1	8.09
42558	0	2476	0	1	22.52
42578	1	1	1	1
42580	0	4	0	1	23.02
42584	0	2	0	1	2.32
42586	0	1550	0	1
42626	0	3	0	1	5.55
42632	0	1292	0	1	35.94
42644	0	17	1	1	20.75
42647	0	177	0	1	7.53
42648	0	0		1	4.71
42664	0	299	0	1	6.79
42678	0	1886	0	1	4.71
42681	0	3	0	1	16.96
42716	0	4	0	1	1.18
42725	0	61	0	0	-8.26
42730	0	2736	0	1	4.28
42732	0	28	1	1
42735	1	0	1	1
42738	0	105	1	1	14.23
42739	0	0	0	1
42756	1	7	1	1	23.68
42758	1	2	1	1	9.45
42778	0	10	0	1	9.95
42779	1	0	1	1
42795	0	44	0	1	4.14
42796	1	3	1	1	16.5
42800	0	2788	0	1	8.05
42805	0	43	0	1	6.23
42806	0	202	0	1	9.97
42807	0	43	1	1	22.46
42816	0	512	0	1	5.71
42821	0	1988	0	1	9.47
42825	0	83	0	1	6.21
42853	0	35	0	1	3.83
42855	0	18	0	1	12.04
42857	0	236	0	1	4.51
42865	0	2749	0	1	6.39
42866	1	0	1
42868	0	2783	0	1	8.77
42877	1	5	1	1	21.11
42885	0	834	0	1	11.04
42908	1	0	1	1
42915	0	1185	0	1
42924	0	118	0	1	1.63
42943	1	6	1	1	2.83
42952	0	0		1	16.32
42980	0	217	0	0	3.08
42987	0	73	1	1	16.38
42998	1	9	1	1	3.65
43000	0	2763	0	1
43003	0	49	0	1	40.59
43004	0	494	0	1	17.54
43012	0	158	0	1
43017	0	2756	0	1	3.78
43024	1	0	1	1
43028	1	1	1	1	24.44
43037	0	0		1	13.42
43066	0	1954	0	1	5.78
43071	0	8	0	1	2.83
43072	0	0		1	7.51
43090	0	6	0	1	7.27
43095	0	2456	0	1
43102	0	2777	0	1
43108	0	78	0
43109	0	513	0	1	4.71
43117	0	2063	0	1	12.85
43118	0	2720	0	1	3.77
43137	0	97	0	1	8.81
43143	0	6	0	1	19.48
43148	1	9	1	1	-3.87
43149	1	5	1	1	8.33
43154	0	0		1	7.18
43163	0	2	0	1	14.66
43164	0	300	0	1	5.44
43182	0	517	1	1	21.82
43196	0	2711	0	1
43203	0	21	1	1	28.75
43206	0	27	1	1	16.46
43219	1	4	1	1	15.16
43223	1	4	1	1	5.58
43225	0	2212	0	1	4.27
43241	0	27	1	0	32.84
43242	0	10	0	1	9.53
43248	0	11	0	1	5.91
43253	0	6	0	1	7
43256	0	2230	0	1	9.68
43267	0	11	1	1	6.02
43270	1	5	1	1	1.63
43273	0	3	0	1	3.77
43275	1	9	1	1	11.87
43276	0	37	0	1
43296	0	2241	0	1
43297	0	54	0	1
43302	0	2126	0	1	8.56
43312	0	717	0	1
43313	0	175	0	1	7.98
43345	1	7	1	0	26.26
43357	0	0		1
43360	0	1805	0	1	13.06
43366	0	12	0	1	6.72
43369	0	5	0	1
43370	0	62	0	1
43382	1	13	0	0	26.54
43385	0	160	0	1	4.71
43400	0	54	0	1	5.97
43403	0	0		1	4.25
43404	0	7	1	0	17.55
43410	0	66	0	1	13.61
43411	0	15	0	1
43422	0	2539	0	1
43424	0	2542	0	1
43428	0	15	0	1	10.66
43429	0	16	0	1	11.39
43434	0	233	0	1
43443	1	24	1	1	44.4
43446	0	1087	0	1	-0.87
43463	0	1214	1	1	6.51
43474	0	275	0	1	11.19
43478	0	6	1	1	32.92
43479	0	54	0	1	9.32
43492	0	0		1	9.57
43497	0	166	0	1
43508	1	1	0	1
43509	0	2727	0	1	3.1
43523	0	2788	0	1	4.15
43529	0	2003	0	1	13.49
43536	0	2005	0	1	4.27
43539	0	11	0	1	10.01
43541	0	3	1
43547	1	3	1	1	31
43555	1	0	0	1
43564	0	4	0	1	4.56
43572	0	1415	1	1	11.14
43578	0	3	0	1	5.65
43584	0	0	0
43587	0	2359	0	1
43590	0	89	1	0	8.04
43603	0	77	0	1	6.93
43606	0	7	0	1	3.37
43608	0	15	0	1	0.09
43619	0	12	0	1	-6.97
43624	0	7	0	1	7.65
43631	0	2646	0	1	7.44
43645	0	323	0	1	-1.73
43647	0	2617	0	0	9.07
43649	0	1797	0	1	5.32
43655	0	9	0	1	1.25
43659	0	0	1	1	6.6
43660	0	159	0	1	9.26
43662	0	2519	0	1	1.63
43665	0	10	1	1	5.91
43667	0	12	0	1	11.12
43673	1	0	1	1
43675	1	1	1	1	16.35
43677	0	2226	0	1	3.39
43699	0	0		1	12.68
43702	1	1	1	1
43706	0	135	0	1	5.41
43719	0	336	0	1	6.51
43723	0	2624	0	1	5.05
43725	0	2344	0	1	5.55
43728	0	3	1	1	-2.46
43749	0	2747	0	1	7.96
43751	0	318	0	1	0.85
43762	0	3	0	1	3.78
43763	0	69	0	1
43768	0	6	0	1	7.9
43778	1	1	1	1	36.47
43802	0	0		1
43808	0	3	0	1	24.54
43809	0	906	0	0	13.36
43812	0	2104	0	1	0.31
43813	1	7	1	0	11.11
43817	0	135	0	1	15.38
43837	0	2424	0	1	7.76
43839	0	60	1	1	0.68
43841	0	2472	0	1	12.9
43844	0	2346	0	0	8.09
43845	1	1	1	1	18.24
43855	0	2	0	1	5.27
43864	0	1937	0	1	5.85
43868	0	461	0	0	24.88
43871	0	325	0	1	8.99
43883	0	9	1	1	4.17
43893	0	8	0	1	5.35
43898	0	708	1	1	15.57
43903	0	2273	0	1	6.22
43910	0	0		1	4.16
43919	0	1	0	1
43920	0	1517	0	1	3.73
43927	1	10	0	1	12.37
43947	0	1235	0	1	2.92
43952	0	2748	0	1	14.88
43956	0	18	1	1	20.61
43978	0	1228	1	1	13.86
43983	0	4	0	1	6.78
43988	0	813	0	1	7.44
44015	0	1895	0	1	28.74
44030	0	1019	1	1	23.95
44031	0	1	1	1	2.05
44039	1	3	0	1	15.42
44042	1	6	1	1	17.7
44048	0	2672	0	1	2.4
44063	0	61	0	1	3.1
44064	0	18	0	1	3.24
44083	1	1	1	1	30.87
44085	1	1	1	1	6.93
44090	0	2671	0	1	7.94
44094	0	848	0	1	4.11
44098	0	2	0	1	3.96
44100	1	0	1	1
44102	0	1332	0	1	3.47
44112	0	2514	0	1	3.54
44118	0	2484	0	1	3.44
44124	0	2	0	1	13.77
44128	0	2732	0	1	1.9
44131	1	0	1	1
44136	0	3	0	1	7.86
44140	0	2087	1	1	19.36
44143	0	9	1	0	24.08
44149	0	28	1	1	23.73
44152	0	0		1	4.64
44154	0	42	1	1	6.46
44155	1	0	1	1
44164	0	185	0	1	11.65
44165	1	0	1	1
44170	0	2665	0	1	5.42
44174	0	10	0	1	2.32
44187	0	2	0	1	6.93
44189	1	1	1	1
44202	1	0	1	1
44204	0	8	0	1	2.69
44209	0	2380	0	1	7.8
44224	1	1	1	1	11.91
44227	0	279	0	1	-0.25
44228	0	1479	1	1	6.39
44230	0	4	1	1	30.82
44232	0	63	1	1	14.03
44254	0	0		0	28.57
44258	1	7	1	1	24.26
44259	0	1446	0	1	5.55
44266	0	697	0	1	16.96
44273	0	28	0	1	6.8
44276	0	802	0	1
44277	0	2490	0	1
44281	0	17	0	1	-1.72
44291	0	3	0	1	5.94
44292	0	1319	0	1	5.56
44295	0	2700	0	1	6.37
44309	0	2	0	1
44322	1	0	1	1
44332	0	1492	0	1
44337	0	1905	0	1	11.91
44346	1	1	1	1
44348	0	1766	0	1	10.53
44365	0	2504	0	1	28.68
44369	0	1609	0	1	13.63
44375	1	0	1	1
44376	0	361	0	1	7.9
44377	0	0		1	12.97
44388	0	2498	0	1	3.85
44389	0	2556	0	1	12.39
44396	0	1756	0	1	8.3
44398	0	29	1	1
44402	0	1377	0	1	11.58
44407	0	7	0	1	15.8
44428	0	0		1	30.84
44430	1	1	0	1	18.09
44432	0	2240	0	1	10.69
44434	0	1543	0	1
44438	1	0	1	1
44440	0	13	0	1	14.9
44445	1	0	1	1
44446	0	11	0	0	15.26
44464	0	276	0	1	1.49
44467	0	2041	0	1	10.76
44469	0	784	0	1
44471	1	0	0	1
44491	0	2547	0	1	4.46
44492	0	2456	0	1	6.23
44496	0	2376	0	1
44497	0	2228	0	1	8.05
44498	0	2682	0	1
44521	0	124	0	1	6.16
44522	0	2	0	1
44527	0	8	0	1	7.93
44528	0	50	0	1	13.71
44533	0	2447	0	1	7.81
44537	0	1470	0	0	19.02
44540	0	0		1	1.63
44546	0	1733	0	1	5.18
44549	0	2739	0	1	14.43
44552	1	12	1	1	21.06
44553	1	5	1	1	8.45
44568	0	6	0	1	10.38
44571	0	4	0	1	3.97
44574	0	1893	0	1
44578	0	1896	0	1	10.4
44579	0	2470	0	1	14.39
44584	0	237	0	1	6.39
44595	0	1012	0	1
44603	0	286	0	1	6.95
44606	0	2503	0	1	1.65
44610	1	0	1	1
44611	0	24	0	1	24.42
44618	0	943	0	1
44619	0	2682	0	1	34.59
44620	0	2439	0	1
44623	0	3	0	1	2.93
44630	0	2470	0	1	6.37
44632	0	2	0	1	8.77
44633	1	5	1	1	29.45
44635	0	956	1	1
44641	0	2505	0	1	5.33
44654	0	3	0	1	2.33
44670	0	2002	0	1	5.87
44676	1	5	1	1	20.63
44677	0	4	1
44679	0	0		1	21.85
44684	0	1505	0	1	0.79
44688	0	0		1	22.83
44695	1	2	1	1	23.91
44710	1	1	1	1	26.4
44723	0	206	0	1	9.96
44747	0	16	0	1	11.61
44750	0	10	1	1	11.23
44751	0	3	0	1	9.96
44772	0	25	1	1	12.1
44775	0	1950	0	1	4.91
44777	0	4	0	1	9.23
44778	1	1	1	1	28.15
44779	1	2	1	1
44784	0	16	0	1	28.67
44798	0	910	0	1	3.26
44803	0	1003	0	1	6.92
44809	0	0		0	16.87
44810	0	23	1	1	14.31
44821	0	2406	0	1	2.33
44832	1	1	1	1	13.58
44835	0	8	0	1	-0.22
44836	0	2568	0	1	29.46
44846	0	2413	0	1	4.85
44852	0	249	0	1	14.02
44871	0	746	0	1	10.1
44881	0	95	0	1	17.2
44884	0	9	0	1	8.18
44885	1	10	1	1	17.64
44887	1	1	1	1	16.78
44897	0	0		1	13.29
44919	0	24	1	1	28.3
44921	1	1	1	1
44933	0	84	1	1	10.41
44935	0	2724	0	1	13.71
44938	0	1130	0	1	7.65
44944	0	248	0	1	15.04
44945	0	17	0	1	10.99
44949	0	2462	0	1
44950	0	591	0	1
44951	1	10	1	1	8.38
44953	0	315	0	1	13.17
44963	0	1189	0	1	4.81
44964	0	49	0	1	7.61
44975	0	1282	0	1	9.38
44987	0	2205	0	1	15.87
45004	0	2689	0	0	12.69
45021	0	1488	0	1
45022	0	0		1
45030	0	45	0	1
45033	1	5	1	1	6.62
45049	0	1277	0	1
45064	0	866	0	1	4.5
45068	0	1228	0	1	22.78
45077	0	2649	0	1	-0.06
45089	0	1227	0	1	24.54
45107	0	21	0	1	2.82
45111	0	128	1	1	13.54
45121	0	2632	0	1	16.59
45128	1	0	1
45131	0	8	0	1	5.68
45138	0	542	0	1
45167	0	2692	0	1	5.14
45170	1	2	1	1	23.27
45187	1	3	1	1	25.72
45226	0	24	0	1	9.59
45229	0	2472	0	1
45230	0	20	0	1	13.38
45234	0	249	1	0	12.8
45239	0	167	0	1	8.78
45245	0	5	0	1
45248	0	2281	0	1	7.03
45251	0	0		1	20.12
45259	0	1194	0	1	3.39
45274	0	2700	0	1	6.25
45297	0	62	0	1	5.17
45299	0	287	0	1	3.54
45302	0	777	1	1	6.52
45309	0	2481	0	1	14.94
45318	0	0		1	4.6
45319	1	1	1	1
45321	0	0		1	4.22
45323	0	2698	0	1
45324	0	4	0	1	24.61
45338	0	26	0	1	6.71
45342	1	11	1	1	14.73
45343	0	11	1	1	4.06
45345	0	2409	0	1	4.89
45354	0	0		1	9.94
45373	0	2240	0	1	6.62
45385	0	2016	0	1
45391	0	1	0	1	13.68
45407	0	54	1	1	22
45416	0	5	0	1	14.75
45418	0	1044	0	1	27.33
45420	0	1702	0	1	5.71
45441	0	2644	0	1	6.95
45456	0	1571	0	1
45467	0	38	0	1	22.33
45473	0	1105	0	1	6.15
45475	1	0	1	1
45480	0	3	0	1	16.41
45483	1	1	1	1	7.77
45493	0	1799	0	1	24.42
45509	0	22	1	1	20.07
45514	0	2	0	1	11.11
45527	0	2452	0	1	7.76
45542	0	74	0	1	5.14
45558	0	1927	0	1	2.93
45565	0	8	0	1	0.81
45566	0	9	0	1	8.61
45577	0	8	0	1	7.2
45584	1	11	1	1	9.85
45592	0	2675	0	1	8.25
45595	0	2685	0	1	5.14
45606	0	2352	0	1	3.51
45609	0	28	0	1	1.47
45614	0	15	0	1	7.07
45615	0	6	0	1	3.73
45620	0	3	0	1	6.93
45631	0	1802	0	1	-1.21
45635	0	25	0	1
45649	0	209	0	1	1.01
45650	0	10	1	1	1.65
45651	0	2229	0	1	9.04
45658	0	0		1	19.21
45659	0	1961	0	1	11.16
45670	0	631	0	1	24.35
45680	0	0		1	12.72
45690	0	38	0	1	13.79
45699	0	2172	0	1	19.1
45703	0	1905	0	1	5.2
45707	0	538	0	1	3.1
45719	0	70	0	1	7.71
45753	0	2221	0	1	5.72
45757	0	224	0	1	17.79
45758	0	203	0	1	4.25
45762	0	4	0	1	10.62
45771	0	2295	0	1
45772	0	10	0	1	4.32
45794	0	3	0	1	6.13
45796	0	51	0	1
45802	0	0		1	29.35
45809	1	3	1	1	12.81
45836	1	1	1	1
45837	0	1374	0	1	5.41
45838	0	3	0	1	8.98
45840	1	4	1	1	10.32
45851	0	2683	0	1	4.45
45860	0	847	0	1	-1.3
45870	0	786	0	1	-0.07
45872	0	6	0	1	6.93
45874	0	2099	0	1	6.04
45877	0	881	0	1	10.21
45898	0	3	0	1	6.03
45937	0	55	1	1	10.85
45942	0	2493	0	1	7.06
45947	0	28	0	1	11.99
45961	1	2	1	1	8.58
45964	0	2167	0	1	5.71
45968	0	0		1	12.26
45975	0	428	0	1	-1.94
45977	0	297	0	1
45978	0	27	0	1	5.99
45982	0	2586	0	1	13.62
45989	0	0		1	22.87
45994	0	1606	0	1	4.37
45995	0	0		1
45996	0	16	0	1	18.67
46004	0	7	0	1	16.23
46050	1	0	1
46065	0	2485	0	1	2.97
46066	0	2366	0	1
46067	1	1	1	1
46084	0	171	0	1	2.18
46089	0	34	1	1	16.66
46119	0	791	0	1	12.97
46124	1	2	1	1	11.62
46138	0	496	0	1	4.45
46145	1	10	1	1	29.32
46150	1	0	1	1
46154	0	82	0	1	10.36
46155	0	10	0	1	8.29
46156	0	10	0	1	16.87
46159	0	209	0	1	7.07
46174	0	5	0	1	11.01
46194	0	1458	0	1	9.57
46197	0	1885	0	1	8.29
46211	0	7	0	1	19.22
46231	0	171	0	1
46234	0	0		1
46236	0	2365	0	1	6.25
46239	0	2663	0	1	10.55
46250	0	163	1	1	24.55
46265	0	9	0	1	2.65
46319	1	0	1	1
46322	1	21	1	1	17.53
46330	0	18	0	1
46341	0	29	1	1	4.56
46342	0	1839	0	1	3.11
46343	0	1835	0	1	1.11
46346	0	14	0	1
46350	0	17	0	1	10.69
46353	1	2	1	1	14.08
46364	0	86	0	1	20.68
46366	0	1725	0	1	11.04
46367	0	2185	0	1
46385	0	186	0	1	14.59
46395	0	15	0	1	19.42
46402	1	0	1	1
46408	0	0		1
46413	0	950	0	1	14.56
46417	0	30	0	1	23.37
46419	0	589	0	1	7.18
46432	0	1	0	1	7.91
46438	0	2661	0	1	19.46
46447	0	2630	0	1	5.04
46456	0	93	1	1	1.17
46478	0	0		1
46481	0	1903	0	1	7.94
46482	0	5	0	1	6.03
46484	0	2574	0	1	13.14
46489	0	10	0	1	0.39
46490	0	2587	0
46492	1	4	1	1	18.56
46503	0	1914	0	1	5.06
46512	0	238	0	1	0.86
46516	0	87	1	1	8.45
46519	0	2556	0	1	3.37
46524	0	760	0	1	4.23
46531	0	4	1	1	16.35
46564	0	7	0	1	3.65
46572	0	1944	0	1	7.98
46583	0	2472	0	1	8.24
46593	0	7	0	1	4.89
46611	1	12	0	1	9.76
46624	0	1845	0	1	-3.83
46627	0	1962	0	1
46636	0	3	0	1	3.83
46643	1	5	1	1	11.6
46658	0	16	0	1	11.68
46659	0	24	1	1	12.38
46668	0	2	0	1	8.17
46671	0	55	1	1	28.9
46693	0	15	0	1	7.61
46719	0	2380	0	1	8.42
46724	0	34	0	1	11.73
46734	0	683	0	1
46753	0	38	0	1	27.6
46754	0	15	0	1	-2.13
46767	0	2637	0	1	27.94
46808	0	57	1	1	5.05
46809	0	2	0	1	20.04
46826	0	2567	1	1	1.9
46839	0	5	0	1	2.32
46863	0	17	0	1	7.65
46864	0	1633	0	1	8.3
46875	0	29	0	1	21.75
46882	1	1	1	1
46886	0	1248	0	1	19.94
46889	0	14	0	1	15.95
46894	0	8	0	1	14.55
46896	0	8	0	1	16.5
46926	0	25	1	1	28.41
46930	0	6	0	1	7.18
46954	0	3	0	1	2.82
46958	0	678	0	1	-12.24
46970	0	72	0	1	14.49
46973	1	2	1	1	7.96
46975	1	3	1	1	-0.8
46979	0	11	0	1	14
46985	0	3	0	1	0.86
47005	0	950	0	1	13.73
47010	0	15	0	1	10.48
47024	0	2603	0	1	-0.01
47034	0	2325	0	1	5.12
47060	0	509	0	1	1.6
47084	0	3	0	1	5.5
47106	0	0		1	16.74
47124	0	2616	0	1	16.6
47136	0	21	0	1	15.4
47140	0	2285	0	1	14.98
47144	0	13	0	1	10.32
47146	0	9	1	1	8.31
47155	1	26	0	1	9.26
47160	0	2298	0	1	7.07
47163	0	2542	0	1
47173	0	2	0	1	1.7
47180	0	0		1	13.31
47200	1	1	1	1	13.7
47202	0	3	0	1	5.32
47210	0	5	0	1
47219	0	26	0	1
47222	0	177	0	1	12.33
47225	0	84	0	1	11.53
47229	0	38	1	1	4.76
47240	0	2	0	1	0.39
47272	0	2351	0	1	4.65
47288	0	679	0	1	15.37
47293	0	3	0	1	11.23
47296	0	13	1	1	6.82
47298	1	3	1	1	32.4
47305	0	0		1	27.89
47307	0	9	1	1	22.88
47310	0	100	0
47319	0	2578	0	1
47320	0	2508	0	1	31.34
47326	0	2605	0	1	4.19
47340	0	2111	0	1	9.39
47342	0	2585	0	1	0.86
47361	0	1458	0	1	24.32
47363	0	4	0	1	7.08
47370	0	1999	0	1	-1.38
47374	0	6	1	1	27.52
47375	1	4	1	1	9.09
47389	0	24	1	1	17.33
47391	1	1	1	1	26.18
47416	0	8	0	1
47423	0	28	1	1	9.43
47430	1	1	1	1
47446	1	5	1	1	18.16
47455	0	492	0	1	3.48
47459	1	0	1	1
47468	0	15	0	1	17.31
47469	1	4	1	1	30.47
47479	0	1906	0	1	-2.37
47487	1	1	0	1	14.47
47492	0	17	0	1	10.96
47499	1	0	1	1
47500	0	6	1	1	22.7
47529	0	1038	1	1	16.89
47536	1	6	1	1	29.54
47539	0	2273	1	1	8.4
47576	0	1728	0	1	22.23
47581	0	2354	0	1	4.01
47596	0	25	0	1	7.8
47602	0	1446	0	1	28.26
47615	0	354	0	1	12.7
47617	0	0		1	15.36
47618	0	21	1	1	13.81
47655	0	2	0	1	3.54
47658	0	2102	0	1	6.93
47670	0	16	0	1	14.18
47709	0	238	0	1
47714	0	1478	0	1	7.03
47747	0	17	0	1	7.44
47750	0	83	0	1	10.64
47760	0	207	0	1	-3.6
47769	0	15	1	1	13.49
47771	0	7	0	1	9.35
47775	1	0	1	1
47778	0	1482	0	1	5.3
47806	0	5	0	1	8.75
47811	1	3	1	1	24.6
47834	0	2313	0	1
47844	0	6	0	1	7.71
47851	0	14	0	1	6.06
47856	0	17	0	1	34.71
47865	0	15	0	1	0.82
47877	1	1	1	1	22.79
47898	0	252	0	1	2.18
47899	0	638	0	1	-13.14
47903	0	2460	0
[truncated: 2,689 more rows]
